# Supplementary material
Source: PubMed Central journal article supplement (PMC4711146)
Supplement: AEM.02518-15_zam999116809so1.pdf [file AEM.02518-15_zam999116809so1.pdf]

Table S1 Importance of the variables on classification of different culture fermentations

| Variables             | %IncMSE (%) | Variables             | IncNodePurity |
|-----------------------|-------------|-----------------------|---------------|
| Ethyl acetate         | 14          | Ethyl acetate         | 78            |
| 3-Methylbutyric acid  | 12.5        | 3-Methylbutyric acid  | 67            |
| Ethyl hexanoate       | 10          | Ethyl hexanoate       | 25            |
| Geranyl acetone       | 9.5         | 4-Vinylguaiacol       | 20            |
| 2-Phenylethanol       | 7.4         | Geranyl acetone       | 18            |
| Isobutanol            | 6.1         | Isobutanol            | 17            |
| Ethyl succinate       | 5.8         | 2-Phenylethanol       | 14            |
| 2-Phenylethyl acetate | 5.5         | 2-Methylbutyl acetate | 12            |
| 4-Vinylguaiacol       | 5.1         | Benzaldehyde          | 11            |
| 2-Methylbutyl acetate | 4.8         | Ethyl octanoate       | 10            |
| Benzaldehyde          | 4.6         | Tetramethylpyrazine   | 9.2           |
| 2,3-Butanediol        | 4.5         | Ethyl caprate         | 8.2           |
| 1-Nonanol             | 4.3         | $\gamma$ -Octalactone | 7.5           |
| Nonanoic acid         | 4.1         | Isobutyric acid       | 6.9           |
| Isobutyric acid       | 3.7         | 1-Nonanol             | 6.1           |
| Ethyl octanoate       | 3.5         | 2-Phenylethyl acetate | 5.3           |
| Ethyl propionate      | 3.2         | Acetic acid           | 4.5           |
| Ethyl oenanthate      | 2.9         | Octanoic acid         | 4.0           |
| Tetramethylpyrazine   | 2.7         | Isoamyl alcohol       | 3.2           |
| 1-Octen-3-ol          | 2.4         | Ethyl phenylacetate   | 2.6           |
| Acetic acid           | 2.3         | 3-Methylthiopropanol  | 1.8           |
| Octanoic acid         | 2.1         | 3-Hydroxy-2-butanone  | 1             |
| Capric acid           | 1.8         |                       |               |
| 3-Methylthiopropanol  | 1.5         |                       |               |
